# Supplementary material for: Analysis of the Problem of Waste in Relation to Food Consumers
Source: MDPI journal article supplement (doi:10.3390/su141811126), 2022-09-06
Supplement: s1 [file s1]

Archive with 1 entries (1 files):
- sustainability-1848379-supplementary.pdf
